# Supplementary material for: Development of a Novel Whey Date Beverage Fermented with Kefir Grains Using Response Surface Methodology
Source: Hindawi journal article supplement (doi:10.1155/2019/1218058), 2019-12-24
Supplement: f1 [file 1218058.f1.pdf]

## Graphical abstract

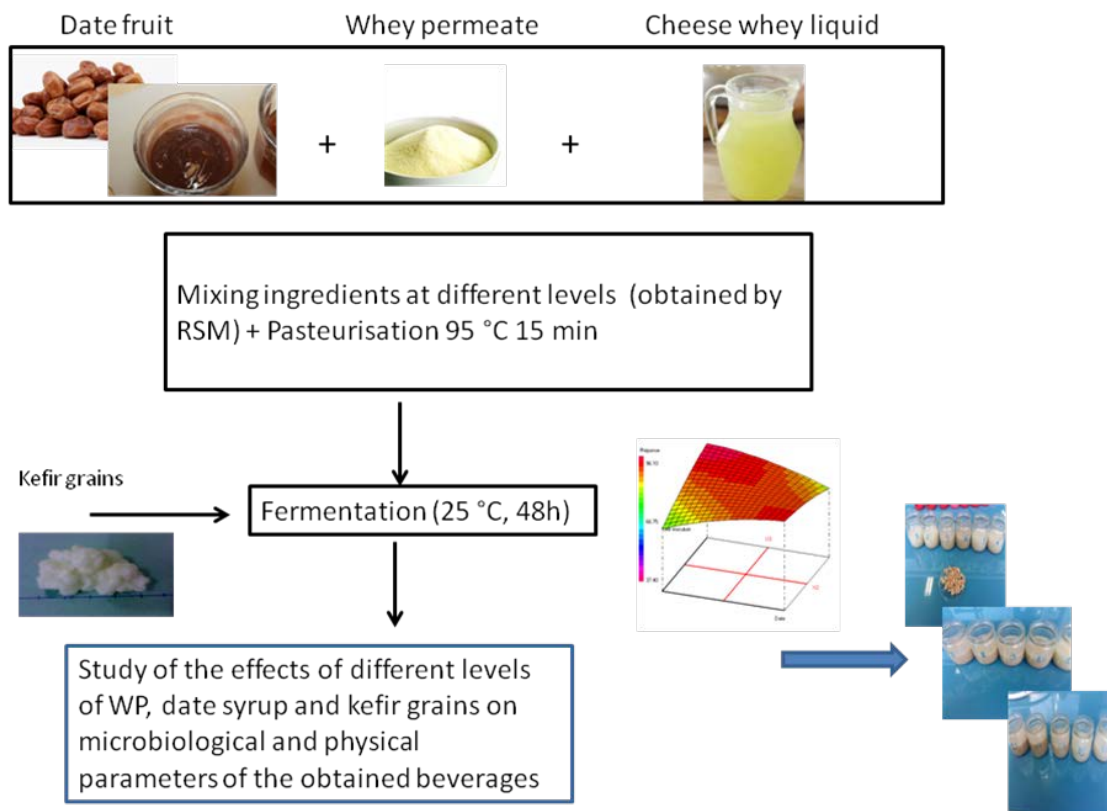

Kefir beverages formulation made with cheese whey, whey permeate and Date Syrup
